# Supplementary material for: Early and Polyantigenic CD4 T Cell Responses Correlate with Mild Disease in Acute COVID-19 Donors
Source: MDPI journal article supplement (doi:10.3390/ijms23137155), 2022-06-28
Supplement: s1 [file s1]

**Figure S2**

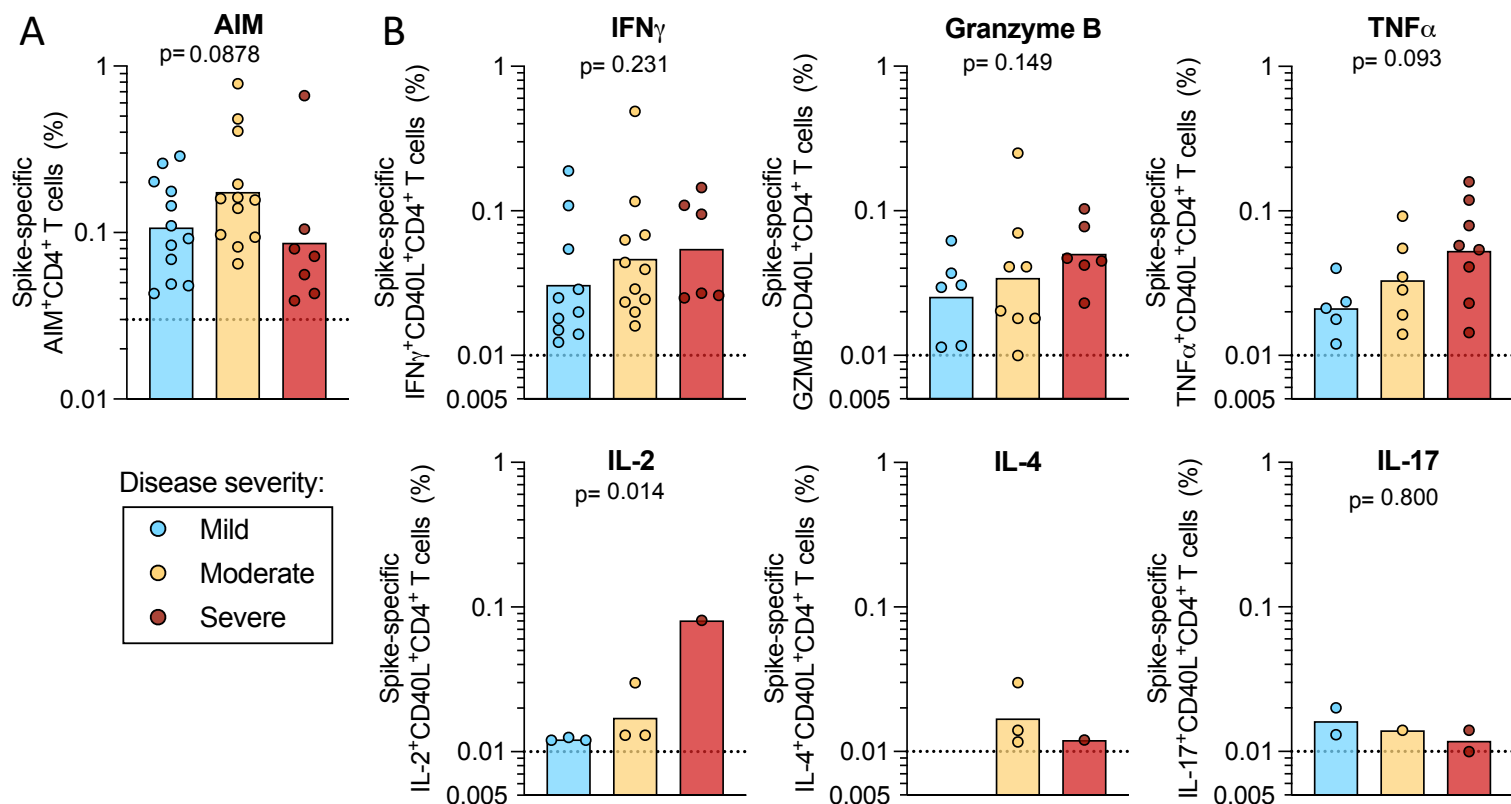

**Figure S2. CD4<sup>+</sup> T cell responses to SARS-CoV-2 Spike in responding mild, moderate and severe COVID-19 donors**

PBMCs from acute COVID-19 donors were tested for CD4<sup>+</sup> T cell responses to SARS-CoV-2 S by AIM + ICS assay. The donors tested were categorized as having mild (n=21), moderate (n=35), or severe (n=33) COVID-19 and only the donors with CD4<sup>+</sup> T cell responses to S are plotted here. **(A)** CD4<sup>+</sup> T cell responses to S as measured by the co-expression of OX40 and CD69. **(B)** CD4<sup>+</sup> T cell responses were measured by the cells expressing CD40L in combination with production of IFN $\gamma$ , Granzyme B, TNF $\alpha$ , IL-2, IL-4 or IL-17. All data shown is background subtracted and SI>2. The geometric mean is represented by bars and the dotted line represents the LOS. The y-axis starts at the LOD. p values are calculated by Kruskal-Wallis One-way ANOVA and, when significant, further Mann-Whitney U tests are applied between disease severities and significant results are indicated by the symbols.
