# Supplementary material for: Early and Polyantigenic CD4 T Cell Responses Correlate with Mild Disease in Acute COVID-19 Donors
Source: MDPI journal article supplement (doi:10.3390/ijms23137155), 2022-06-28
Supplement: s1 [file s1]

**Figure S1**

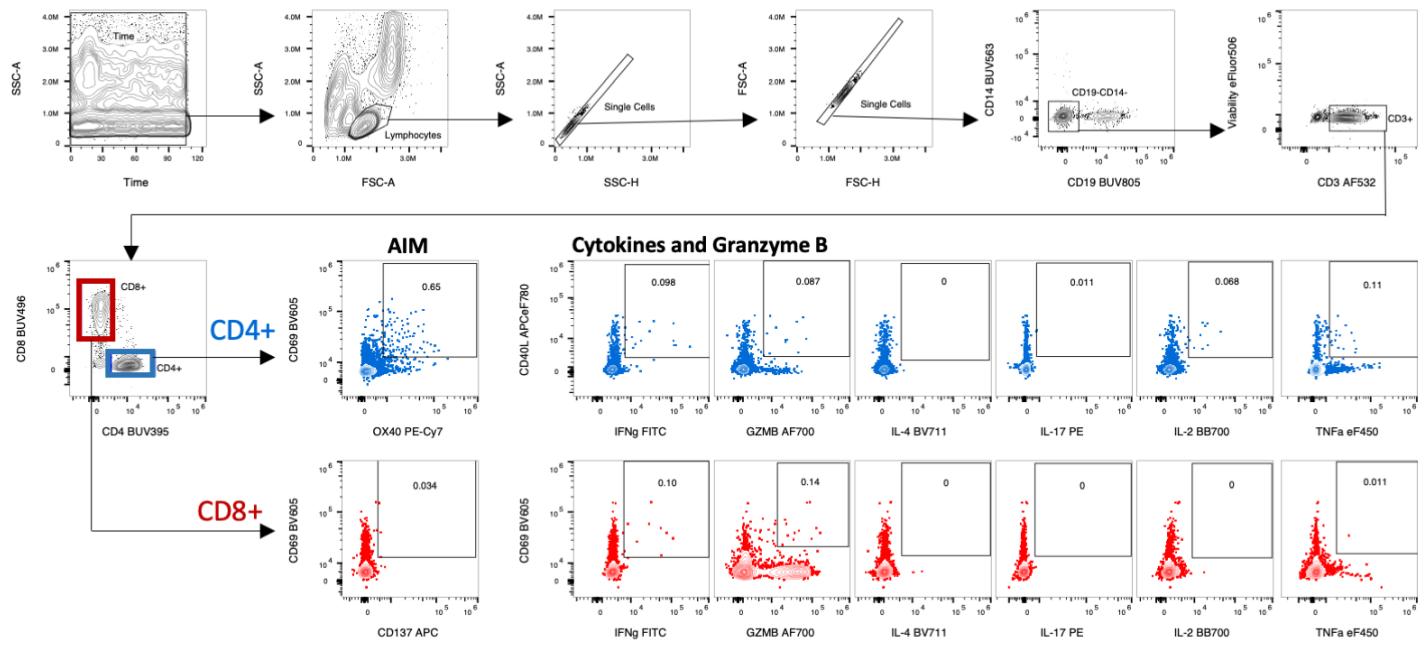

**Figure S1. Gating strategy for AIM + ICS assay**  
The combined AIM + ICS assay was utilized for this study and a representative mild acute COVID-19 donor is shown for the gating strategy. In brief, the cells are sequentially gated for time, lymphocytes, singlets, and CD14-CD19-. Then CD3+ T cells are further gated on CD4+ or CD8+ T cells in order to define populations of AIM+, and cytokines or Granzyme B.
